# Supplementary material for: Serine Proteolytic Pathway Activation Reveals an Expanded Ensemble of Wound Response Genes in Drosophila
Source: PubMed Central journal article supplement (PMC3634835; doi:10.1371/journal.pone.0061773), 2013-04-24
Supplement: pone.0061773.s008.pdf [file pone.0061773.s008.pdf]

| <b>[Trypsin] uM</b> | <b>Global WRA</b> | <b>Trypsin-induced<br/>Death</b> | <b># Embryos</b> |
|---------------------|-------------------|----------------------------------|------------------|
| 31                  | 13%               | 18%                              | 97               |
| 40                  | 56%               | 20%                              | 142              |
| 52                  | 77%               | 59%                              | 149              |
| 83                  | 78%               | 60%                              | 174              |
| 233                 | 85%               | 79%                              | 153              |
