# Supplementary material for: Serine Proteolytic Pathway Activation Reveals an Expanded Ensemble of Wound Response Genes in Drosophila
Source: PubMed Central journal article supplement (PMC3634835; doi:10.1371/journal.pone.0061773), 2013-04-24
Supplement: pone.0061773.s009.pdf [file pone.0061773.s009.pdf]

| CG #    | Gene symbol | Puncture fold change | Trypsin fold change | Highest fold change |
|---------|-------------|----------------------|---------------------|---------------------|
| CG18372 | AttB        | 33.8                 | 73.7                | trypsin             |
| CG15066 | IM23        | 19.9                 | 56.2                | trypsin             |
| CG10146 | AttA        | 18.4                 | 40.3                | trypsin             |
| CG18106 | IM2         | 17.7                 | 49.1                | trypsin             |
| CG15065 | CG15065     | 17.6                 | 44.2                | trypsin             |
| CG18108 | IM1         | 16.6                 | 38.9                | trypsin             |
| CG15231 | IM4         | 16.0                 | 28.0                | trypsin             |
| CG18067 | CG18067     | 15.3                 | 62.4                | trypsin             |
| CG16844 | IM3         | 15.1                 | 27.4                | trypsin             |
| CG15067 | CG15067     | 14.9                 | 37.9                | trypsin             |
| CG2444  | CG2444      | 14.6                 | 54.8                | trypsin             |
| CG16836 | CG16836     | 11.4                 | 33.8                | trypsin             |
| CG4740  | AttC        | 10.7                 | 44.1                | trypsin             |
| CG18279 | IM10        | 10.6                 | 18.4                | trypsin             |
| CG10810 | Drs         | 10.0                 | 39.0                | trypsin             |
| CG30080 | CG30080     | 9.6                  | 36.1                | trypsin             |
| CG18107 | CG18107     | 9.4                  | 38.1                | trypsin             |
| CG8175  | Mtk         | 8.6                  | 26.0                | trypsin             |
| CG7300  | CG7300      | 8.1                  | 7.1                 | puncture            |
| CG10505 | CG10505     | 7.8                  | 4.8                 | puncture            |
| CG6186  | Tsf1        | 7.3                  | 15.8                | trypsin             |
| CG7294  | CG7294      | 6.8                  | 24.2                | trypsin             |
| CG15068 | CG15068     | 6.5                  | 11.4                | trypsin             |
| CG13224 | Cpr47Eb     | 6.4                  | 29.8                | trypsin             |
| CG10794 | DptB        | 6.0                  | 7.5                 | trypsin             |
| CG11668 | CG11668     | 5.9                  | 12.9                | trypsin             |
| CG14186 | CG14186     | 5.7                  | 9.3                 | trypsin             |
| CG9649  | CG9649      | 5.5                  | 19.2                | trypsin             |
| CG2217  | CG2217      | 5.5                  | 13.9                | trypsin             |
| CG13422 | CG13422     | 5.4                  | 24.4                | trypsin             |
| CG14567 | CG14567     | 5.3                  | 45.9                | trypsin             |
| CG4381  | GstD3       | 5.2                  | 6.7                 | trypsin             |
| CG5778  | CG5778      | 5.1                  | 19.9                | trypsin             |
| CG6188  | CG6188      | 5.1                  | 3.5                 | puncture            |
| CG1864  | Hr38        | 5.0                  | 8.1                 | trypsin             |
| CG11842 | CG11842     | 5.0                  | 16.8                | trypsin             |
| CG30091 | CG30091     | 4.9                  | 10.4                | trypsin             |
| CG16713 | CG16713     | 4.6                  | 10.1                | trypsin             |
| CG6023  | CG6023      | 4.6                  | 7.9                 | trypsin             |
| CG9989  | CG9989      | 4.6                  | 7.2                 | trypsin             |
| CG14059 | CG14059     | 4.3                  | 16.9                | trypsin             |
| CG4269  | CG4269      | 4.2                  | 6.1                 | trypsin             |
| CG9451  | CG9451      | 4.2                  | 7.1                 | trypsin             |
| CG14419 | CG14419     | 4.0                  | 2.6                 | puncture            |
| CG1365  | CecA1       | 3.9                  | 2.5                 | puncture            |
| CG14866 | CG14866     | 3.8                  | 14.9                | trypsin             |
| CG33192 | MtnD        | 3.8                  | 3.9                 | trypsin             |
| CG5791  | CG5791      | 3.8                  | 12.4                | trypsin             |
| CG32241 | CG32241     | 3.7                  | 4.2                 | trypsin             |
| CG1373  | CecC        | 3.6                  | 2.1                 | puncture            |
| CG2045  | Ser7        | 3.5                  | 6.8                 | trypsin             |
| CG1689  | Iz          | 3.5                  | 14.0                | trypsin             |
| CG4316  | Sb          | 3.5                  | 7.7                 | trypsin             |
| CG13659 | CG13659     | 3.2                  | 4.9                 | trypsin             |
| CG15675 | CG15675     | 3.2                  | 4.0                 | trypsin             |
| CG17107 | CG17107     | 3.2                  | 14.6                | trypsin             |
| CG4437  | PGRP-LF     | 3.2                  | 5.6                 | trypsin             |
| CG5493  | CG5493      | 3.2                  | 7.2                 | trypsin             |
| CG5157  | CG5157      | 3.2                  | 2.5                 | puncture            |
| CG7459  | Ctr1B       | 3.1                  | 1.9                 | puncture            |
| CG18349 | Cpr67Fa2    | 3.1                  | #N/A                | #N/A                |
| CG2914  | Ets21C      | 3.1                  | 5.0                 | trypsin             |
| CG15282 | CG15282     | 3.1                  | 6.9                 | trypsin             |
| CG11992 | Rel         | 3.1                  | 6.4                 | trypsin             |
| CG15678 | CG15678     | 3.1                  | 5.3                 | trypsin             |
| CG34454 | CG34454     | 3.1                  | 21.9                | trypsin             |
| CG31769 | CG31769     | 3.0                  | 5.8                 | trypsin             |
| CG13226 | CG13226     | 3.0                  | 11.9                | trypsin             |
| CG10842 | Cyp4p1      | 3.0                  | 5.1                 | trypsin             |
| CG9733  | CG9733      | 3.0                  | 18.9                | trypsin             |
| CG11086 | Gadd45      | 2.9                  | 6.6                 | trypsin             |
| CG3669  | CG3669      | 2.9                  | 6.7                 | trypsin             |
| CG16704 | CG16704     | 2.9                  | 11.5                | trypsin             |
| CG8216  | CG8216      | 2.9                  | 4.3                 | trypsin             |
| CG32185 | CG32185     | 2.8                  | #N/A                | #N/A                |
| CG12868 | CG12868     | 2.8                  | 3.5                 | trypsin             |
| CG15394 | CG15394     | 2.8                  | 14.7                | trypsin             |
| CG1851  | Ady43A      | 2.7                  | 9.3                 | trypsin             |
| CG5993  | os          | 2.7                  | 4.3                 | trypsin             |
| CG13699 | CG13699     | 2.7                  | 17.3                | trypsin             |
| CG4371  | GstD7       | 2.7                  | 7.6                 | trypsin             |
| CG4998  | CG4998      | 2.7                  | 7.7                 | trypsin             |
| CG7432  | CG7432      | 2.7                  | 21.1                | trypsin             |
| CG11450 | net         | 2.7                  | #N/A                | #N/A                |
| CG1148  | Osi2        | 2.7                  | 14.7                | trypsin             |
| CG7941  | Cpr67Fa1    | 2.6                  | #N/A                | #N/A                |
| CG1857  | nec         | 2.6                  | 6.2                 | trypsin             |
| CG9438  | Cyp6a2      | 2.6                  | 2.5                 | puncture            |

|         |           |     |      |          |
|---------|-----------|-----|------|----------|
| CG30154 | CG30154   | 2.6 | 5.9  | trypsin  |
| CG5162  | CG5162    | 2.6 | 3.4  | trypsin  |
| CG9452  | CG9452    | 2.6 | 4.6  | trypsin  |
| CG5391  | CG5391    | 2.6 | 79.1 | trypsin  |
| CG9077  | Cpr47Ec   | 2.6 | 23.4 | trypsin  |
| CG31370 | CG31370   | 2.5 | 4.3  | trypsin  |
| CG8738  | CG8738    | 2.5 | 3.8  | trypsin  |
| CG15279 | CG15279   | 2.5 | 5.0  | trypsin  |
| CG6553  | CG6553    | 2.5 | 9.5  | trypsin  |
| CG3540  | Cyp4d14   | 2.5 | #N/A | #N/A     |
| CG6639  | CG6639    | 2.5 | 5.5  | trypsin  |
| CG14695 | CG14695   | 2.5 | 2.9  | trypsin  |
| CG9811  | Rgk1      | 2.5 | 3.7  | trypsin  |
| CG4577  | CG4577    | 2.5 | 3.9  | trypsin  |
| CG8170  | CG8170    | 2.5 | 12.4 | trypsin  |
| CG4927  | CG4927    | 2.5 | 4.0  | trypsin  |
| CG14606 | CG14606   | 2.4 | 3.5  | trypsin  |
| CG9312  | CG9312    | 2.4 | 8.9  | trypsin  |
| CG31288 | CG31288   | 2.4 | 1.9  | puncture |
| CG34165 | CG34165   | 2.4 | 3.3  | trypsin  |
| CG33468 | CG33468   | 2.4 | 3.7  | trypsin  |
| CG3666  | Ts3       | 2.4 | 9.9  | trypsin  |
| CG8620  | CG8620    | 2.4 | 7.8  | trypsin  |
| CG10550 | CG10550   | 2.4 | 2.9  | trypsin  |
| CG4026  | IP3K1     | 2.3 | 2.2  | puncture |
| CG10513 | CG10513   | 2.3 | #N/A | #N/A     |
| CG30026 | CG30026   | 2.3 | 3.7  | trypsin  |
| CG2065  | CG2065    | 2.3 | 2.5  | trypsin  |
| CG17836 | CG17836   | 2.3 | 2.7  | trypsin  |
| CG9134  | CG9134    | 2.3 | #N/A | #N/A     |
| CG30151 | CG30151   | 2.2 | 6.0  | trypsin  |
| CG33542 | upd3      | 2.2 | 4.7  | trypsin  |
| CG6908  | CG6908    | 2.2 | #N/A | #N/A     |
| CG13323 | CG13323   | 2.2 | 5.9  | trypsin  |
| CG12763 | Dpt       | 2.2 | #N/A | #N/A     |
| CG11012 | Ugt37a1   | 2.2 | 4.4  | trypsin  |
| CG15102 | Jheh2     | 2.2 | #N/A | #N/A     |
| CG9572  | CG9572    | 2.2 | 6.1  | trypsin  |
| CG31300 | CG31300   | 2.2 | 1.8  | puncture |
| CG33462 | CG33462   | 2.2 | 4.5  | trypsin  |
| CG31326 | CG31326   | 2.2 | 6.8  | trypsin  |
| CG18641 | CG18641   | 2.2 | 9.6  | trypsin  |
| CG5639  | CG5639    | 2.2 | 10.6 | trypsin  |
| CG9360  | CG9360    | 2.2 | 2.0  | puncture |
| CG7539  | Edg91     | 2.2 | 12.3 | trypsin  |
| CG15515 | CG15515   | 2.1 | 2.3  | trypsin  |
| CG15784 | CG15784   | 2.1 | 5.1  | trypsin  |
| CG15293 | CG15293   | 2.1 | 3.6  | trypsin  |
| CG5550  | CG5550    | 2.1 | 16.4 | trypsin  |
| CG13641 | CG13641   | 2.1 | 2.2  | trypsin  |
| CG17044 | yellow-e2 | 2.1 | 8.0  | trypsin  |
| CG10247 | Cyp6a21   | 2.1 | 2.0  | puncture |
| CG14219 | CG14219   | 2.1 | 4.3  | trypsin  |
| CG7219  | CG7219    | 2.1 | 10.3 | trypsin  |
| CG4821  | Tequila   | 2.1 | 3.9  | trypsin  |
| CG10363 | TepIV     | 2.1 | 4.2  | trypsin  |
| CG14495 | CG14495   | 2.1 | 2.4  | trypsin  |
| CG10560 | CG10560   | 2.1 | 3.3  | trypsin  |
| CG11709 | PGRP-SA   | 2.0 | 6.2  | trypsin  |
| CG10211 | CG10211   | 2.0 | 4.0  | trypsin  |
| CG7272  | CG7272    | 2.0 | 1.8  | puncture |
| CG8502  | Cpr49Ac   | 2.0 | 5.9  | trypsin  |
| CG3962  | Keap1     | 2.0 | 3.3  | trypsin  |
| CG6658  | Ugt86Di   | 2.0 | #N/A | #N/A     |
| CG11878 | CG11878   | 2.0 | 2.5  | trypsin  |
| CG33329 | Sp212     | 2.0 | 7.6  | trypsin  |
| CG17524 | GstE3     | 2.0 | 2.8  | trypsin  |
| CG13946 | CG13946   | 2.0 | #N/A | #N/A     |
| CG16705 | SPE       | 2.0 | 4.1  | trypsin  |
| CG13325 | CG13325   | 2.0 | 3.6  | trypsin  |
| CG10245 | Cyp6a20   | 2.0 | 2.4  | trypsin  |
| CG4432  | PGRP-LC   | 2.0 | 2.5  | trypsin  |
| CG1367  | CecA2     | 2.0 | #N/A | #N/A     |
| CG4739  | Ugt86Dc   | 2.0 | #N/A | #N/A     |
| CG2060  | Cyp4e2    | 2.0 | #N/A | #N/A     |
| CG32244 | CG32244   | 2.0 | #N/A | #N/A     |
| CG17191 | CG17191   | 2.0 | 5.6  | trypsin  |
| CG14680 | Cyp12e1   | 1.9 | 2.0  | trypsin  |
| CG9616  | CG9616    | 1.9 | 2.9  | trypsin  |
| CG9498  | CG9498    | 1.9 | 4.1  | trypsin  |
| CG31436 | CG31436   | 1.9 | 2.2  | trypsin  |
| CG6113  | CG6113    | 1.9 | #N/A | #N/A     |
| CG5327  | CG5327    | 1.9 | 3.3  | trypsin  |
| CG15695 | CG15695   | 1.9 | #N/A | #N/A     |
| CG6955  | Lcp65Ad   | 1.9 | #N/A | #N/A     |
| CG10045 | GstD1     | 1.9 | 3.9  | trypsin  |
| CG14326 | CG14326   | 1.9 | 22.8 | trypsin  |
| CG5008  | GGBP3     | 1.9 | 3.3  | trypsin  |
| CG11395 | CG11395   | 1.9 | 2.5  | trypsin  |
| CG4607  | CG4607    | 1.9 | 2.3  | trypsin  |
| CG2056  | spirit    | 1.9 | 3.5  | trypsin  |
| CG8317  | CG8317    | 1.9 | 2.0  | trypsin  |

|         |             |     |      |         |
|---------|-------------|-----|------|---------|
| CG3036  | CG3036      | 1.9 | 2.5  | trypsin |
| CG34035 | CG34035     | 1.9 | 2.4  | trypsin |
| CG8160  | CG8160      | 1.9 | 1.9  | trypsin |
| CG15046 | CG15046     | 1.9 | 3.4  | trypsin |
| CG4120  | Cyp12c1     | 1.9 | #N/A | #N/A    |
| CG13780 | Pvf2        | 1.9 | 1.9  | trypsin |
| CG8205  | fus         | 1.9 | 1.9  | trypsin |
| CG13324 | CG13324     | 1.9 | 10.1 | trypsin |
| CG13862 | CG13862     | 1.9 | 7.3  | trypsin |
| CG10337 | CG10337     | 1.9 | 4.6  | trypsin |
| CG14704 | PGRP-LB     | 1.8 | 3.5  | trypsin |
| CG4847  | CG4847      | 1.8 | 4.0  | trypsin |
| CG3672  | Cpr67B      | 1.8 | 6.7  | trypsin |
| CG9441  | Pu          | 1.8 | 3.5  | trypsin |
| CG6283  | CG6283      | 1.8 | 13.1 | trypsin |
| CG1583  | Gllspla2    | 1.8 | 2.5  | trypsin |
| CG16978 | CG16978     | 1.8 | #N/A | #N/A    |
| CG11425 | CG11425     | 1.8 | 3.6  | trypsin |
| CG4182  | yellow-c    | 1.8 | 5.7  | trypsin |
| CG9453  | Spn4        | 1.8 | 3.0  | trypsin |
| CG33246 | Ste:CG33246 | 1.8 | #N/A | #N/A    |
| CG41277 | CG41277     | 1.8 | 2.4  | trypsin |
| CG33346 | CG33346     | 1.8 | 2.1  | trypsin |
| CG3066  | Sp7         | 1.8 | 3.4  | trypsin |
| CG7450  | CrebA       | 1.8 | 2.6  | trypsin |
| CG4942  | CG4942      | 1.8 | 2.4  | trypsin |
| CG14275 | CG14275     | 1.8 | 2.2  | trypsin |
| CG16712 | CG16712     | 1.8 | 2.8  | trypsin |
| CG31104 | CG31104     | 1.8 | #N/A | #N/A    |
| CG3597  | CG3597      | 1.8 | #N/A | #N/A    |
